# Supplementary material for: Effects of Organophosphate-Degrading Bacteria on the Plant Biomass, Active Medicinal Components, and Soil Phosphorus Levels of Paris polyphylla var. yunnanensis
Source: MDPI journal article supplement (doi:10.3390/plants12030631), 2023-01-31
Supplement: s1 [file s1]

**Table S1.** Linear equations, correlation coefficients, and linear ranges for steroidal saponins

| Name               | Regression equation | R <sup>2</sup> | Linear range (μg·mL <sup>-1</sup> ) |
|--------------------|---------------------|----------------|-------------------------------------|
| Pseudoprotodioscin | Y=6927.7X-14494.0   | 0.9992         | 23.60–188.80                        |
| Polyphyllin VII    | Y=6202.0X-3225.4    | 0.9997         | 20.65–165.20                        |
| Polyphyllin H      | Y=6513.7X-9075.1    | 0.9992         | 23.25–186.00                        |
| Polyphyllin II     | Y=6141.8X-6846.1    | 0.9991         | 20.55–164.40                        |
| Dioscin            | Y=6703.0X-14192.0   | 0.9994         | 30.65–245.20                        |
| Polyphyllin I      | Y=6898.5X-30902.0   | 0.9996         | 31.85–254.80                        |

**Table S2.** Steroidal saponin spiked recovery experiments

| Name               | Weighing<br>volume (g) | Saponin<br>content<br>(μg) | Amount<br>added<br>(μg) | Measured<br>amount<br>(μg) | Recovery<br>rate<br>(%) | Mean<br>value<br>(%) | RSD<br>(%) |
|--------------------|------------------------|----------------------------|-------------------------|----------------------------|-------------------------|----------------------|------------|
| Pseudoprotodioscin | 0.2504                 | 31.801                     | 23.600                  | 54.399                     | 95.75                   | 95.80                | 1.10       |
|                    | 0.2502                 | 31.775                     | 23.600                  | 54.449                     | 96.07                   |                      |            |
|                    | 0.2509                 | 31.864                     | 23.600                  | 54.264                     | 94.92                   |                      |            |
|                    | 0.2508                 | 31.852                     | 23.600                  | 54.327                     | 95.23                   |                      |            |
|                    | 0.2501                 | 31.763                     | 23.600                  | 54.854                     | 97.84                   |                      |            |
|                    | 0.2505                 | 31.814                     | 23.600                  | 54.225                     | 94.96                   |                      |            |
| Polyphyllin VII    | 0.2504                 | 246.143                    | 206.500                 | 450.188                    | 98.81                   | 98.40                | 1.79       |
|                    | 0.2502                 | 245.947                    | 206.500                 | 449.714                    | 98.68                   |                      |            |
|                    | 0.2509                 | 246.635                    | 206.500                 | 445.664                    | 96.38                   |                      |            |
|                    | 0.2508                 | 246.536                    | 206.500                 | 445.937                    | 96.56                   |                      |            |
|                    | 0.2501                 | 245.848                    | 206.500                 | 449.687                    | 98.71                   |                      |            |
|                    | 0.2505                 | 246.242                    | 206.500                 | 455.381                    | 101.28                  |                      |            |
| Polyphyllin H      | 0.2504                 | 113.431                    | 116.250                 | 231.918                    | 101.92                  | 101.75               | 2.76       |
|                    | 0.2502                 | 113.341                    | 116.250                 | 234.144                    | 103.92                  |                      |            |

|                |        |         |         |          |        |        |      |
|----------------|--------|---------|---------|----------|--------|--------|------|
|                | 0.2509 | 113.658 | 116.250 | 228.261  | 98.58  |        |      |
|                | 0.2508 | 113.612 | 116.250 | 230.523  | 100.57 |        |      |
|                | 0.2501 | 113.295 | 116.250 | 236.397  | 105.89 |        |      |
|                | 0.2505 | 113.477 | 116.250 | 229.248  | 99.59  |        |      |
| Polyphyllin II | 0.2504 | 696.112 | 616.500 | 1306.988 | 99.09  | 98.81  | 0.88 |
|                | 0.2502 | 695.556 | 616.500 | 1309.100 | 99.52  |        |      |
|                | 0.2509 | 697.502 | 616.500 | 1303.691 | 98.33  |        |      |
|                | 0.2508 | 697.224 | 616.500 | 1309.325 | 99.29  |        |      |
|                | 0.2501 | 695.278 | 616.500 | 1308.215 | 99.42  |        |      |
|                | 0.2505 | 696.390 | 616.500 | 1295.831 | 97.23  |        |      |
| Dioscin        | 0.2504 | 82.382  | 91.950  | 176.004  | 101.82 | 102.52 | 0.90 |
|                | 0.2502 | 82.316  | 91.950  | 176.108  | 102.00 |        |      |
|                | 0.2509 | 82.546  | 91.950  | 175.985  | 101.62 |        |      |
|                | 0.2508 | 82.513  | 91.950  | 176.733  | 102.47 |        |      |
|                | 0.2501 | 82.283  | 91.950  | 177.395  | 103.44 |        |      |
|                | 0.2505 | 82.415  | 91.950  | 177.852  | 103.79 |        |      |
| Polyphyllin I  | 0.2504 | 163.511 | 159.250 | 320.222  | 98.41  | 98.72  | 0.84 |
|                | 0.2502 | 163.381 | 159.250 | 320.966  | 98.95  |        |      |
|                | 0.2509 | 163.838 | 159.250 | 318.762  | 97.28  |        |      |
|                | 0.2508 | 163.772 | 159.250 | 320.892  | 98.66  |        |      |
|                | 0.2501 | 163.315 | 159.250 | 321.857  | 99.56  |        |      |
|                | 0.2505 | 163.577 | 159.250 | 321.995  | 99.48  |        |      |
